# Supplementary material for: Short-Term Efficacy of an Innovative Mobile Phone Technology-Based Intervention for Weight Management for Overweight and Obese Adolescents: Pilot Study
Source: PubMed Central journal article supplement (PMC5559653; doi:10.2196/ijmr.7860), 2017-08-02
Supplement: ijmr_v6i2e12_app1.pdf [file ijmr_v6i2e12_app1.pdf]

iStart Smart for Teens Courses Messages Diary Fitbit student: Jyu-Lin Chen Settings Logout

**ISTART SMART FOR TEENS**  
Week 1

- Introduction
- Balance
- 5210
- Fitness Corner
- Step by Step Goals
- SMART Goals
- Wrap-up
- Lesson evaluation
- References

NEXT SECTION:  
WEEK 2

### Introduction

iStart Smart Week 1 Introduction



prev next

iStart Smart for Teens Courses Messages Diary Fitbit student: Jyu-Lin Chen Settings Logout

**ISTART SMART FOR TEENS**  
Week 1

- Introduction
- Balance
- 5210
- Fitness Corner
- Step by Step Goals
- SMART Goals
- Wrap-up
- Lesson evaluation
- References

NEXT SECTION:  
WEEK 2

### 5210

Childhood Obesity Initiative 5210 Messaging Campaign



prev next
